# Supplementary material
Source: PubMed Central journal article supplement (PMC5802346)
Supplement: NIHMS916186-supplement-Supplemental_Material.pdf [file NIHMS916186-supplement-Supplemental_Material.pdf]

## SUPPLEMENTAL MATERIALS

|                                                                                                                               | <b>Page</b> |
|-------------------------------------------------------------------------------------------------------------------------------|-------------|
| Supplemental Table 1: List of Potentially Causative Genetic Variants                                                          | <b>2</b>    |
| Supplemental Table 2: Rare Variants Shared in II-2, II-5, and II-7                                                            | <b>3</b>    |
| Supplemental Table 3: Primers for Site-directed Mutagenesis                                                                   | <b>4</b>    |
| Supplemental Table 4: Potential off-target candidates for CRISPR-Cas9 mediated mutagenesis                                    | <b>5</b>    |
| Supplemental Table 5: Exome Sequencing Coverage Data                                                                          | <b>6</b>    |
| Supplemental Table 6: Number of Candidate Variants Identified by Exome Sequencing                                             | <b>7</b>    |
| Supplemental Table 7: References for Known Filamin C mutations, illustrated in <i>Figure 1D</i>                               | <b>8</b>    |
| Supplemental Figure 1: Analysis of p.V2297M stem cell-derived cardiomyocytes.                                                 | <b>9</b>    |
| Supplemental Figure 2: Supplemental Figure 2: Localization of WT and mutant FLNC following overexpression in C2C12 myoblasts. | <b>10</b>   |
| Supplemental References                                                                                                       | <b>11</b>   |

**Supplemental Table 1:** List of Potentially Causative Genetic Variants

| Gene    | Location            | Description | Conservation score** | Cardiac expression-LV* | Cardiac expression - LAA* | Mutation Taster prediction | SIFT score | Polyphen score    | rsID        | MAF ExAC | MAF EVS |
|---------|---------------------|-------------|----------------------|------------------------|---------------------------|----------------------------|------------|-------------------|-------------|----------|---------|
| NBAS    | chr2-15319114:T->C  | T2280A      | -4.204               | 6.617                  | 5.178                     | polymorphism               | 0.273      | benign            | rs140346039 | 0.157    | 0.100   |
| FAM179A | chr2-29274799:G->A  | R967H       | 3.643                | 3.352                  | 4.186                     | disease causing            | 0.007      | probably damaging | rs200413260 | 0.036    | 0.033   |
| COL6A6  | chr3-130293046:G->C | G1075A      | 2.335                | 0.297                  | 2.337                     | polymorphism               | 0.068      | probably damaging | rs149093613 | 0.131    | 0.294   |
| PLOD3   | chr7-100852231:G->A | P564L       | 5.062                | 13.487                 | 18.047                    | disease causing            | 0.001      | probably damaging | -           | 0.002    | -       |
| ST7     | chr7-116770645:C->T | R184C       | 3.372                | 4.215                  | 5.022                     | disease causing            | 0.000      | benign            | -           | 0.002    | -       |
| FLNC    | chr7-128494628:G->A | V2297M      | 5.775                | 264.079                | 95.877                    | disease causing            | 0.001      | probably damaging | -           | -        | -       |
| PRPF40B | chr12-50024353:C->T | P10L        | 1.89                 | 3.743                  | 4.331                     | disease causing            | 0.101      | NA                | -           | 0.008    | -       |
| CCDC176 | chr14-74495929:G->A | A110T       | 1.945                | -                      | 0.946                     | disease causing            | 0.139      | possibly damaging | -           | 0.008    | -       |
| IRF2BPL | chr14-77493085:C->T | A351T       | 2.453                | 8.372                  | 13.686                    | disease causing            | 0.139      | probably damaging | rs369556741 | -        | 0.008   |
| TBXA2R  | chr19-3594840:C->G  | K406N       | -0.508               | 1.152                  | 1.014                     | polymorphism               | 0.000      | NA                | rs201087249 | 0.032    | -       |
| MYO18B  | chr22-26224825:A->G | K957E       | 0.491                | 26.184                 | 19.971                    | polymorphism               | 0.164      | benign            | rs200316291 | 0.149    | 0.162   |

\*Expression levels from GTEx Portal expressed in RPKM

\*\*Conservation Score is based on PhyloP Vertebrate basewise conservation (phyloP46wayAll)

**Supplemental Table 2:** Rare variants shared in individuals II-2, II-5, and II-7

| Gene                 | Chr | Position  | Ref_allele | Alt_allele | ExAC freq    | Function                               | Polyphen-2 class |
|----------------------|-----|-----------|------------|------------|--------------|----------------------------------------|------------------|
| PICK1:NM_012407      | 22  | 38469017  | A          | C          | 8.13E-06     | Missense:GAT=>GCT:D234A                | deleterious      |
| IRF2BPL:NM_024496    | 14  | 77493085  | C          | T          | 8.14E-06     | Missense:GCC=>ACC:A351T                | deleterious      |
| CISH:NM_013324       | 3   | 50645169  | G          | A          | 1.63E-05     | Missense:CGC=>TGC:R233C                | neutral          |
| AP1AR:NM_001128426   | 4   | 113187833 | G          | A          | 1.63E-05     | Missense:GAC=>AAC:D169N                | deleterious      |
| PLOD3:NM_001084      | 7   | 100852231 | G          | A          | 1.63E-05     | Missense:CCG=>CTG:P564L                | deleterious      |
| MUC16:NM_024690      | 19  | 9057031   | T          | C          | 1.63E-05     | Missense:ATG=>GTG:M10139V              | neutral          |
| CCDC176:NM_025057    | 14  | 74495929  | G          | A          | 1.68E-05     | Missense:GCC=>ACC:A110T                | deleterious      |
| ST7:NM_021908        | 7   | 116770645 | C          | T          | 2.44E-05     | Missense:CGT=>TGT:R184C                | neutral          |
| GPR179:NM_001004334  | 17  | 36483591  | A          | G          | 2.45E-05     | Missense:CTA=>CCA:L1954P               | neutral          |
| MUC16:NM_024690      | 19  | 9071624   | A          | T          | 2.45E-05     | Missense:AGT=>AGA:S5274R               | deleterious      |
| ZZEF1:NM_015113      | 17  | 3926025   | G          | A          | 3.25E-05     | Missense:ACG=>ATG:T2397M               | deleterious      |
| EXOC3L2:NM_138568    | 19  | 45735079  | G          | C          | 4.07E-05     | Missense:CCC=>CGC:P11R                 | deleterious      |
| PRPF40B:NM_001031698 | 12  | 50024353  | C          | T          | 4.08E-05     | Missense:CCC=>CTC:P10L                 | NA               |
| OR7D4:NM_001005191   | 19  | 9324990   | G          | A          | 5.69E-05     | Missense:CCG=>CTG:P175L                | deleterious      |
| CRYZ:NM_001130043    | 1   | 75188918  | C          | T          | 7.32E-05     | Missense:GTG=>ATG:V50M                 | deleterious      |
| CD163:NM_004244      | 12  | 7640504   | C          | G          | 7.32E-05     | Missense:GGA=>CGA:G534R                | deleterious      |
| LARP4B:NM_015155     | 10  | 909779    | C          | T          | 8.13E-05     | Missense:GCA=>ACA:A112T                | deleterious      |
| FBXO10:NM_012166     | 9   | 37512704  | C          | T          | 8.17E-05     | Missense:CGC=>CAC:R904H                | neutral          |
| HEATR5A:NM_015473    | 14  | 31856380  | G          | C          | 1.39E-04     | Missense:CTT=>GTT:L379V                | neutral          |
| RCN3:NM_020650       | 19  | 50045849  | C          | T          | 1.47E-04     | Missense:GCG=>GTG:A240V                | deleterious      |
| DOCK8:NM_203447      | 9   | 328143    | C          | T          | 1.71E-04     | Missense:CCG=>CTG:P339L                | deleterious      |
| FAM179A:NM_199280    | 2   | 29274799  | G          | A          | 2.13E-04     | Missense:CGC=>CAC:R967H                | deleterious      |
| TBXA2R:NM_201636     | 19  | 3594840   | C          | G          | 2.52E-04     | Missense:AAG=>AAC:K406N                | NA               |
| COL22A1:NM_152888    | 8   | 139662020 | T          | A          | 2.93E-04     | Exonic_Splice.Missense:GAT=>GTT:D1112V | deleterious      |
| TIMP1:NM_003254      | X   | 47444408  | G          | T          | 3.09E-04     | Missense:ATG=>ATT:M65I                 | neutral          |
| CCDC110:NM_001145411 | 4   | 186379567 | T          | C          | 4.07E-04     | Missense:CAT=>CGT:H688R                | neutral          |
| ANKRD13A:NM_033121   | 12  | 110475337 | A          | G          | 6.02E-04     | Missense:CAG=>CGG:Q584R                | neutral          |
| PKHD1:NM_170724      | 6   | 51824808  | T          | A          | 7.73E-04     | Missense:CAG=>CTG:Q1923L               | neutral          |
| TRPV4:NM_001177431   | 12  | 110224603 | C          | T          | 7.73E-04     | Missense:GTA=>ATA:V716I                | deleterious      |
| ZNF521:NM_015461     | 18  | 22806966  | C          | T          | 9.11E-04     | Missense:GGG=>AGG:G306R                | neutral          |
| PTAFR:NM_001164721   | 1   | 28477220  | C          | T          | Not observed | Missense:GTG=>ATG:V105M                | deleterious      |
| FLNC:NM_001458       | 7   | 128494628 | G          | A          | Not observed | Missense:GTG=>ATG:V2297M               | deleterious      |
| CPA2:NM_001869       | 7   | 129919465 | G          | T          | Not observed | Missense:GGG=>GTG:G317V                | deleterious      |
| UGGT2:NM_020121      | 13  | 96515959  | C          | T          | Not observed | Missense:GAA=>AAA:E1190K               | neutral          |

**Supplemental Table 3: Primers for Site-directed Mutagenesis**

| Primer ID   | Primer sequences                           |
|-------------|--------------------------------------------|
| FLNCpart_1F | gctggccggggcgcccctgcaGGTGGCTGTGCTGGGCCC    |
| FLNCpart_1R | tgggcaggcgCTTCAGCAGGCAGGGCTCC              |
| FLNCpart_2F | cctgctgaagCGCCTGCCCAACCGGCAC               |
| FLNCpart_2R | tgaaaggggcTGCCGGGCA <b>T</b> GTGCTGGC      |
| FLNCpart_3F | <b>a</b> tgcccggaGCCCCTTTCAGTTCACTGTG      |
| FLNCpart_3R | agatgagtttctgctcgagcggccGCGTACGCGTAGGGACCT |

Base substitutions are indicated in red. Lowercase letters indicate 5' or 3' overhang utilized in Gibson Assembly.

**Supplemental Table 4: Potential off-target candidates for CRISPR-Cas9 mediated mutagenesis**

| sequence                 | score | mismatches        | UCSC gene    | locus            |
|--------------------------|-------|-------------------|--------------|------------------|
| TGCCGTGGACAGCAGTGCCTG    | 4.3   | 2MMs [2:9]        |              | chr15:-51566300  |
| TGCCGTGGCCAGCAGCTGCCAG   | 2.1   | 2MMs [2:16]       |              | chr22:+19695074  |
| TACAAGGGCCAGCAGTGCCTGG   | 1.4   | 3MMs [4:5:6]      | NM_001456    | chrX:-153580645  |
| GACAGTGGCCAGCAGTGTCCAG   | 1.1   | 3MMs [1:4:19]     |              | chr2:-144584224  |
| AACCGTTGCCAGCAGTGCAGAG   | 1.1   | 3MMs [1:7:20]     |              | chr8:+1532724    |
| AACTGAGTCCAGCAGTGCCTAG   | 0.8   | 4MMs [1:4:6:8]    |              | chr12:+117147314 |
| TCCCGTGGCCTGCACGTGCGGAG  | 0.8   | 3MMs [2:11:20]    |              | chr19:-40769138  |
| TGCTGTGCCCTGCACGTGCCCG   | 0.8   | 4MMs [2:4:8:11]   | NM_001003841 | chr5:+1222957    |
| TCCCATGGCTAGCAGTGTCTGG   | 0.6   | 4MMs [2:5:10:20]  |              | chr2:-107256808  |
| GACCATGACCCAGCAGAGCCAG   | 0.6   | 4MMs [1:5:8:17]   |              | chr13:-31309391  |
| CCCCGAGCCAGCAGTGCCTGG    | 0.6   | 4MMs [1:2:6:7]    |              | chr22:+49023130  |
| TGCCGCCACAGCAGTGCCTGG    | 0.6   | 4MMs [2:6:7:8]    |              | chr9:-34957777   |
| TGCCATGACCCAGCAGTGTCTGG  | 0.5   | 4MMs [2:5:8:19]   |              | chr15:-88759708  |
| TACCATACCACCAAGTGCCTGG   | 0.5   | 4MMs [5:7:8:12]   |              | chr10:-23725961  |
| CACCGTGGCCAGCAGTGCCTGG   | 0.4   | 4MMs [1:5:9:12]   | NM_033081    | chr20:+61512541  |
| CACCTGAGGCCAGCAGTGTCTGAG | 0.4   | 4MMs [1:4:6:20]   |              | chr2:-237638064  |
| GACTGTGCCAGCAGGTGCCTGG   | 0.4   | 4MMs [1:4:8:15]   | NM_001018071 | chr10:+49457281  |
| TGCCCTGTCCAGCAGGTGCCTGG  | 0.4   | 4MMs [2:5:8:15]   |              | chr4:+1163687    |
| TACAGGGCCAGCAGTGTCTGAG   | 0.4   | 4MMs [3:5:6:20]   |              | chr8:-144637771  |
| TGATGTGGCCAGCAAGTGCCTGG  | 0.4   | 4MMs [2:3:4:15]   |              | chr9:-139121628  |
| CAGCGTGGCCTTCAAGTGCCTGG  | 0.4   | 4MMs [1:3:11:12]  |              | chr6:+21488275   |
| TACCATGGCCAGCAGTGCCTGG   | 0.3   | 4MMs [5:10:11:12] |              | chr11:-12221998  |
| TTCCGAGCCTGCAGTGCCTGG    | 0.3   | 4MMs [2:6:7:11]   |              | chr1:-22909646   |
| TTCCCTGGCCTGCACGTGCCAG   | 0.3   | 4MMs [2:5:11:19]  |              | chr20:+61320478  |
| TCACGTGGCCACTACGTGCCAAG  | 0.3   | 4MMs [2:3:12:13]  |              | chr13:+36449100  |
| GACCATGGCCAGCAAGTGTCTGAG | 0.3   | 4MMs [1:5:13:20]  |              | chr11:+134442994 |
| GTACGTGGCCAGCAGTGCCTGG   | 0.3   | 4MMs [1:2:4:16]   | NM_175872    | chr19:+35451280  |
| CCACGTGGCCAGCAGTGCCTGG   | 0.3   | 4MMs [1:2:3:16]   |              | chr22:-47763978  |
| TCCTGTGTCCAGCAGTGCCTGG   | 0.3   | 4MMs [2:4:8:16]   |              | chr3:+50305354   |
| TACCTTGGCCAGCAGTGCCTGG   | 0.3   | 3MMs [5:15:19]    |              | chr2:+47550555   |
| TACCCAGTCAACACGTGCCAGG   | 0.3   | 4MMs [5:6:9:12]   |              | chr22:+29913489  |
| CACCTTGGCCAGCAGTGCCTGG   | 0.3   | 4MMs [1:5:10:16]  |              | chr1:-22515754   |
| GCCCGTGGCTAGCAGTGCCTGG   | 0.3   | 4MMs [1:2:10:16]  |              | chr16:+87598783  |
| TGCCCTGGACAGCAGTGCCTAG   | 0.3   | 4MMs [2:5:9:15]   |              | chr17:+1404983   |
| TGCCGAGCCAGCAAGTGCCTGG   | 0.2   | 4MMs [2:6:8:15]   |              | chr20:+62129853  |
| TACCTTGGCCAGCAGTGCCTGG   | 0.2   | 3MMs [5:12:16]    |              | chr2:+102244068  |
| TACAGGGCCAGCAGTGCCTGG    | 0.2   | 4MMs [4:6:8:15]   |              | chr1:+916943     |
| AGCCGTGGCCAGCAGTGAAGGG   | 0.2   | 4MMs [1:2:19:20]  |              | chrX:+153045568  |
| CACCGTGGCCAGCAGTGAACAGG  | 0.2   | 3MMs [1:18:19]    |              | chr2:-6038494    |
| TACTGTCTCCAGCAGTTCCTGG   | 0.2   | 4MMs [4:7:8:18]   |              | chr2:+237045432  |
| GGCCGTGGCCAGCAGTGCCTGG   | 0.2   | 4MMs [1:2:12:15]  | NM_139209    | chr3:+141497508  |
| GACAGTGGCCAGCAGTGCCTGG   | 0.2   | 4MMs [1:4:12:15]  |              | chr13:-51517829  |
| TGCAGTGGCCAGCAGTGCCTGG   | 0.2   | 4MMs [2:4:12:15]  |              | chr1:+1092411    |
| TGCCCTGGCCATCAAGTGCCTGG  | 0.2   | 4MMs [2:5:12:15]  |              | chr8:+41710326   |
| TCACGTGGCCAGCAGGACGGG    | 0.2   | 4MMs [2:3:17:19]  |              | chr4:-3255729    |
| TACCTTGGCTGCACGAGCCAGG   | 0.2   | 4MMs [5:9:11:17]  |              | chr7:-32258079   |
| TATGTTGGCCATCAAGTGCCTGG  | 0.2   | 4MMs [3:4:12:15]  | NM_001456    | chrX:-153587608  |
| CACCGTGGCCAGCAGTGCCTGG   | 0.2   | 4MMs [1:11:12:20] |              | chr4:-7521263    |
| TCCCGTTGCCAGCAGTGCCTGG   | 0.2   | 4MMs [2:7:13:20]  |              | chr20:+47003220  |

**Supplemental Table 5: Exome Sequencing Coverage Data**

|                                                     | II-2       | III-2       | IV-3        | II-5       | II-7       |
|-----------------------------------------------------|------------|-------------|-------------|------------|------------|
| Total number of reads                               | 53,806,354 | 108,395,860 | 100,257,666 | 98,948,094 | 91,120,572 |
| Mapped reads                                        | 53,352,790 | 107,926,237 | 99,732,477  | 98,471,905 | 90,848,583 |
| Average depth of coverage                           | 48X        | 144X        | 135X        | 131X       | 123X       |
| % of targeted regions with<br>at least 20X coverage | 70.09%     | 98.51%      | 98.31%      | 97.89%     | 97.98%     |

**Supplemental Table 6: Number of Candidate Variants Identified by Exome Sequencing**

|                                                                | <b>II-2</b> | <b>III-2</b> | <b>IV-3</b> | <b>II-5</b> | <b>II-7</b> |
|----------------------------------------------------------------|-------------|--------------|-------------|-------------|-------------|
| Total variants                                                 | 19611       | 20849        | 21029       | 20665       | 20676       |
| Variants following filtration<br>based on population databases | 18371       | 20110        | 20339       | 20019       | 19977       |
| Missense variants                                              | 9409        | 9821         | 9859        | 9671        | 9704        |
| Nonsense variants                                              | 86          | 67           | 76          | 68          | 70          |
| Stopgain variants                                              | 28          | 32           | 33          | 36          | 33          |
| Splice site variants                                           | 64          | 52           | 52          | 57          | 58          |

**Supplemental Table 7: References for Known Filamin C mutations, illustrated in *Figure 1D***

| Description                                      | Primary Phenotypes              | MAF Frequency<br>ExAC | Citations |
|--------------------------------------------------|---------------------------------|-----------------------|-----------|
| Truncation: p.R81*                               | <b>LDAC</b>                     | ---                   | 1         |
| Truncation: p.T83*                               | <b>LDAC</b>                     | ---                   | 1         |
| Missense: p.F106L                                | <b>DCM</b>                      | <b>0.00003390</b>     | 2         |
| Truncation: p.E108*                              | <b>HCM</b>                      | ---                   | 3         |
| Missense: p.V123A                                | <b>HCM/AF</b>                   | ---                   | 3,4       |
| Missense: p.A193T                                | <b>Proximal/Distal Myopathy</b> | ---                   | 5,6       |
| Truncation: p.L194*                              | <b>DCM</b>                      | ---                   | 1         |
| Truncation: p.G201*                              | <b>DCM</b>                      | ---                   | 1         |
| Missense: p.M251T                                | <b>Distal Myopathy</b>          | ---                   | 5,6       |
| Missense: p.N290K                                | <b>HCM</b>                      | ---                   | 3         |
| Truncation: p.Q572*                              | <b>LDAC</b>                     | ---                   | 1         |
| Truncation: p.L737*                              | <b>DCM</b>                      | ---                   | 1         |
| Frameshift:<br>p.K899_V904del //<br>V899_C900ins | <b>MFM</b>                      | ---                   | 7         |
| In frame deletion: p.V920                        | <b>MFM</b>                      | ---                   | 8         |
| Truncation: p.P963*                              | <b>DCM</b>                      | <b>0.00000830</b>     | 1         |
| Truncation: p.F1135*                             | <b>DCM</b>                      | ---                   | 1         |
| Missense: p.Y1216R                               | <b>MFM</b>                      | ---                   | 9         |
| Truncation: p.N1369*                             | <b>DCM</b>                      | ---                   | 1         |
| Missense: p.A1539T                               | <b>HCM/AF</b>                   | ---                   | 4         |
| Missense p.S1624L                                | <b>RCM</b>                      | ---                   | 10        |
| Truncation: p.F1720*                             | <b>Distal Myopathy</b>          | ---                   | 11        |
| Truncation: p.G1800*                             | <b>LDAC</b>                     | ---                   | 1         |
| Missense: p.R2133H                               | <b>HCM</b>                      | ---                   | 3         |
| Truncation: p.G2070*                             | <b>DCM</b>                      | ---                   | 1         |
| Truncation: p.S2077*                             | <b>DCM</b>                      | ---                   | 1         |
| Truncation: p.P2081*                             | <b>DCM</b>                      | ---                   | 1         |
| Missense: p.G2151S                               | <b>HCM</b>                      | ---                   | 3         |
| Missense: p.I2160F                               | <b>RCM</b>                      | ---                   | 10        |
| Missense: p.H2315N                               | <b>HCM</b>                      | ---                   | 3         |
| Truncation: p.R2326*                             | <b>DCM</b>                      | <b>0.0000090</b>      | 1         |
| Missense: p.T2419M                               | <b>MFM</b>                      | ---                   | 12        |
| Missense: p.A2430V                               | <b>HCM</b>                      | <b>0.0002243</b>      | 3         |
| Truncation: D2703*                               | <b>DCM</b>                      | ---                   | 1         |
| Truncation: p.W2710X                             | <b>MFM</b>                      | ---                   | 13        |

**Supplemental Figure 1: Analysis of p.V2297M stem cell-derived cardiomyocytes.** A: Chromatograms demonstrating successful mutation of FLNC but not FLNA in embryonic stem cells. B: qRT-PCR analysis of FLNC expression in 12 day post differentiation cardiomyocytes. C: Analysis of prevalence of FLNC in subcellular fractions by Western blot.

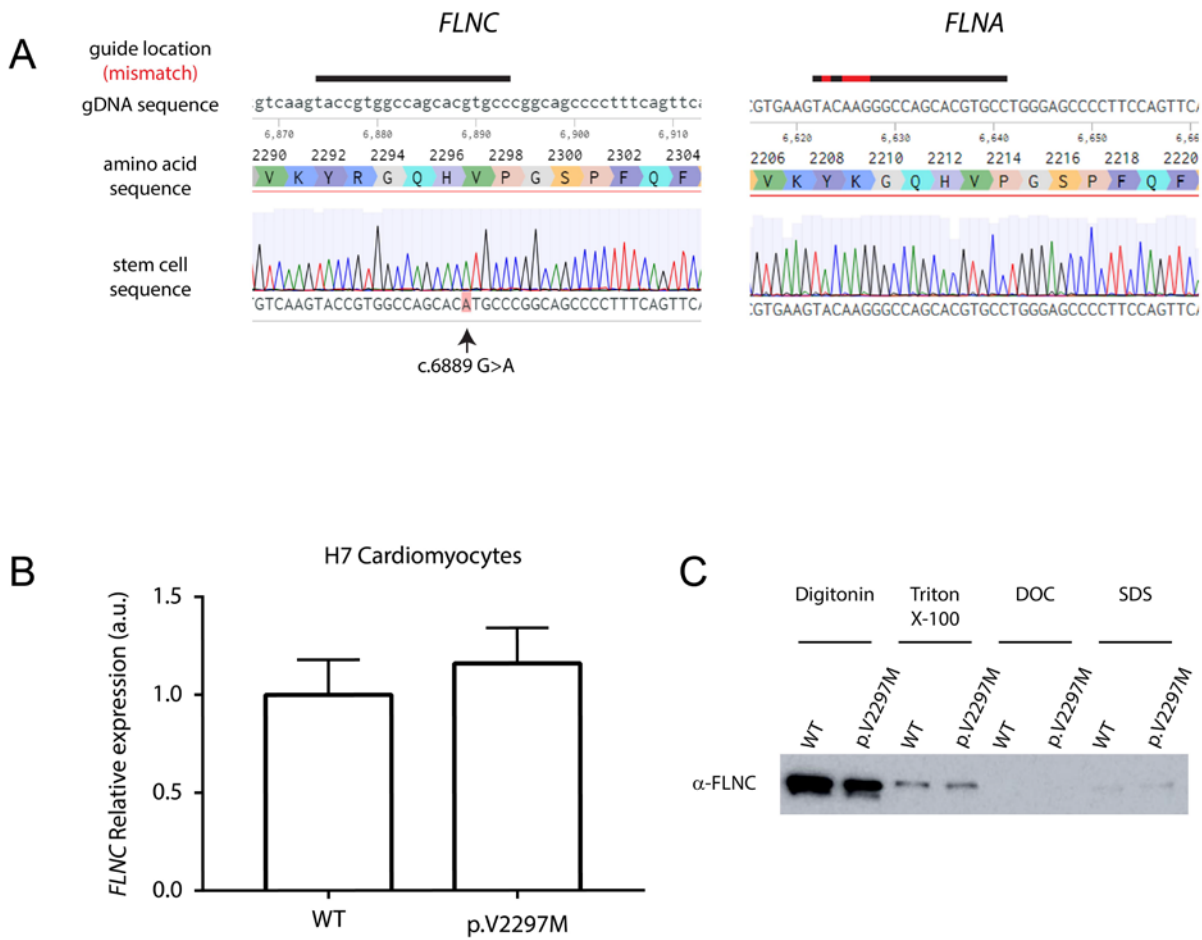

**Supplemental Figure 2: Localization of WT and mutant FLNC following overexpression in C2C12 myoblasts.** Two dimensional reconstructions of confocal z-stacks visualizing the localization of overexpressed, FLAG-tagged FLNC (green) and filamentous actin (red) in undifferentiated C2C12 myoblasts. Merged image includes DAPI (blue) for labeling of nuclei.

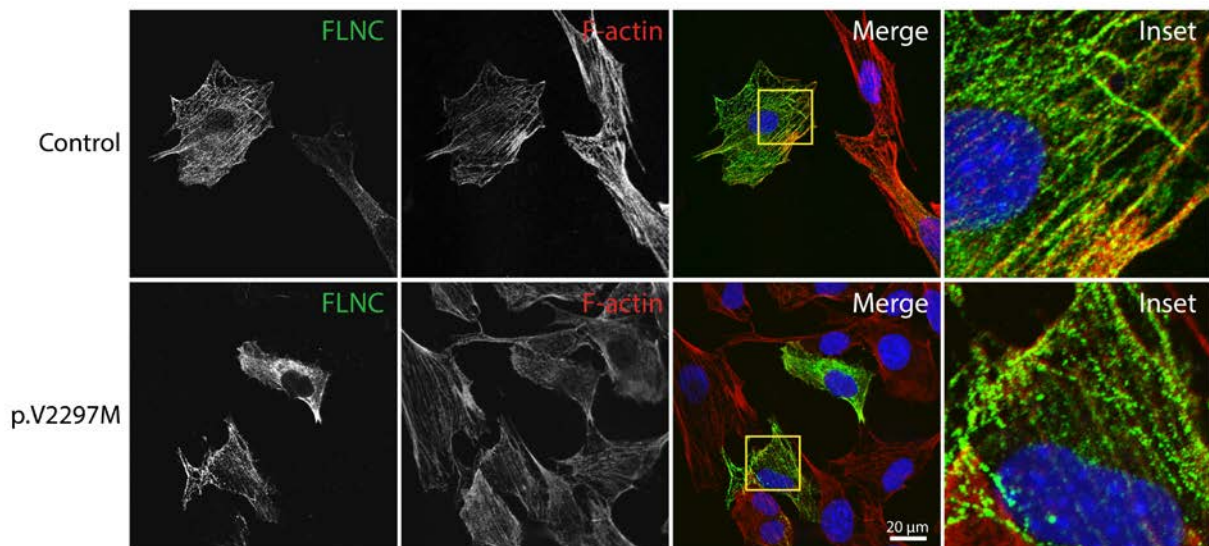

## Supplemental References

1. Ortiz-Genga MFMFMF, Cuenca SS, Dal Ferro M, Zorio E, Salgado-Aranda R, Climent V, Padrón-Barthe L, Duro-Aguado I, Jiménez-Jáimez J, Hidalgo-Olivares VMVMVM, García-Campo E, Lanzillo C, Suárez-Mier MP, Yonath H, Marcos-Alonso S, Ochoa JP, Santomé JL, García-Giustiniani D, Rodríguez-Garrido JL, Domínguez F, Merlo M, Palomino JJJ, Peña ML, Trujillo JP, Martín-Vila A, Stolfo D, Molina P, Lara-Pezzi E, Calvo-Iglesias FE, Nof E, Calò L, Barriales-Villa R, Gimeno-Blanes JR, Arad M, García-Pavía P, Monserrat L, Padrón-Barthe L, Duro-Aguado I, Jiménez-Jáimez J, Hidalgo-Olivares VMVMVM, García-Campo E, Lanzillo C, Suárez-Mier MP, Yonath H, Marcos-Alonso S, Ochoa JP, Santomé JL, García-Giustiniani D, Rodríguez-Garrido JL, Domínguez F, Merlo M, Palomino JJJ, Peña ML, Trujillo JP, Martín-Vila A, Stolfo D, Molina P, Lara-Pezzi E, Calvo-Iglesias FE, Nof E, Calò L, Barriales-Villa R, Gimeno-Blanes JR, Arad M, García-Pavía P, Monserrat L. Truncating FLNC Mutations Are Associated With High-Risk Dilated and Arrhythmogenic Cardiomyopathies. *J Am Coll Cardiol*. 2016;68:2440–2451.
2. Reinstein E, Gutierrez-Fernandez A, Tzur S, Bormans C, Marcu S, Tayeb-Fligelman E, Vinkler C, Raas-Rothschild A, Irge D, Landau M, Shohat M, Puente XS, Behar DM, Lopez-Otin C. Congenital dilated cardiomyopathy caused by biallelic mutations in Filamin C. *Eur J Hum Genet*. 2016;24:1792–1796.
3. Valdés-Mas R, Gutiérrez-Fernández A, Gómez J, Coto E, Astudillo A, Puente DA, Reguero JR, Álvarez V, Morís C, León D, Martín M, Puente XS, López-Otín C. Mutations in filamin C cause a new form of familial hypertrophic cardiomyopathy. *Nat Commun*. 2014;5:5326.
4. Gómez J, Lorca R, Reguero JR, Morís C, Martín M, Tranche S, Alonso B, Iglesias S, Alvarez V, Díaz-Molina B, Avanzas P, Coto E. Screening of the Filamin C Gene in a Large Cohort of Hypertrophic Cardiomyopathy Patients. *Circ Cardiovasc Genet*. 2017;10:e001584.
5. van den Bogaart FJA, Claeys KG, Kley RA, Kusters B, Schrading S, Kamsteeg EJ, Voermans NC. Widening the spectrum of filamin-C myopathy: Predominantly proximal myopathy due to the p.A193T mutation in the actin-binding domain of FLNC. *Neuromuscul Disord*. 2017;27:73–77.
6. Duff RM, Tay V, Hackman P, Ravenscroft G, McLean C, Kennedy P, Steinbach A, Schöffler W, van der Ven PFM, Fürst DO, Song J, Djinić-Carugo K, Penttilä S, Raheem O, Reardon K, Malandrini A, Gambelli S, Villanova M, Nowak KJ, Williams DR, Landers JE, Brown RH, Udd B, Laing NG. Mutations in the N-terminal actin-binding domain of filamin C cause a distal myopathy. *Am J Hum Genet*. 2011;88:729–40.
7. Luan X, Hong D, Zhang W, Wang Z, Yuan Y. A novel heterozygous deletion-insertion mutation (2695-2712 del/GTTTGT ins) in exon 18 of the filamin C gene causes filaminopathy in a large Chinese family. *Neuromuscul Disord*. 2010;20:390–396.
8. Shatunov A, Olivé M, Odgerel Z, Stadelmann-Nessler C, Irlbacher K, van Landeghem F, Bayarsaikhan M, Lee H-S, Goudeau B, Chinnery PF, Straub V, Hilton-Jones D, Damian MS, Kaminska A, Vicart P, Bushby K, Dalakas MC, Sambuughin N, Ferrer I, Goebel HH, Goldfarb LG. In-frame deletion in the seventh immunoglobulin-like repeat of filamin C in a family with myofibrillar myopathy. *Eur J Hum Genet*. 2009;17:656–63.

9. Avila-Smirnow D, Gueneau L, Batonnet-Pichon S, Delort F, Bécane H-M, Claeys K, Beuvin M, Goudeau B, Jais J-P, Nelson I, Richard P, Ben Yaou R, Romero NB, Wahbi K, Mathis S, Voit T, Furst D, van der Ven P, Gil R, Vicart P, Fardeau M, Bonne G, Behin A, Bécane H-M, Claeys K, Beuvin M, Goudeau B, Jais J-P, Nelson I, Richard P, Ben Yaou R, Romero NB, Wahbi K, Mathis S, Voit T, Furst D, van der Ven P, Gil R, Vicart P, Fardeau M, Bonne G, Behin A. Cardiac arrhythmia and late-onset muscle weakness caused by a myofibrillar myopathy with unusual histopathological features due to a novel missense mutation in FLNC. *Rev Neurol (Paris)*. 2016;172:594–606.
10. Brodehl A, Ferrier RA, Hamilton SJ, Greenway SC, Brundler MA, Yu W, Gibson WT, Mckinnon ML, McGillivray B, Alvarez N, Giuffre M, Schwartzentruber J, Gerull B, Boycott K, Friedman J, Michaud J, Bernier F, Brudno M, Fernandez B, Knoppers B, Samuels M, Scherer S. Mutations in FLNC are Associated with Familial Restrictive Cardiomyopathy. *Hum Mutat*. 2016;37:269–279.
11. Guergueltcheva V, Peeters K, Baets J, Ceuterick-de Groote C, Martin JJ, Suls A, De Vriendt E, Mihaylova V, Chamova T, Almeida-Souza L, Ydens E, Tzekov C, Hadjidekov G, Gospodinova M, Storm K, Reyniers E, Bichev S, van der Ven PFM, Fürst DO, Mitev V, Lochmüller H, Timmerman V, Tournev I, De Jonghe P, Jordanova A. Distal myopathy with upper limb predominance caused by filamin C haploinsufficiency. *Neurology*. 2011;77:2105–14.
12. Tasca G, Odgerel Z, Monforte M, Aurino S, Clarke NF, Waddell LB, Udd B, Ricci E, Goldfarb LG. Novel FLNC mutation in a patient with myofibrillar myopathy in combination with late-onset cerebellar ataxia. *Muscle and Nerve*. 2012;46:275–282.
13. Vorgerd M, van der Ven PFM, Bruchertseifer V, Löwe T, Kley RA, Schröder R, Lochmüller H, Himmel M, Koehler K, Fürst DO, Huebner A. A mutation in the dimerization domain of filamin c causes a novel type of autosomal dominant myofibrillar myopathy. *Am J Hum Genet*. 2005;77:297–304.
